# Supplementary material for: Platelet factor 4 (CXCL4/PF4) upregulates matrix metalloproteinase-2 (MMP-2) in gingival fibroblasts
Source: PubMed Central journal article supplement (PMC9633774; doi:10.1038/s41598-022-19850-w), 2022-11-03

## **SUPPLEMENTAL MATERIAL:**

### **Platelet factor 4 (CXCL4/PF4) upregulates matrix metalloproteinase-2 (MMP-2) in gingival fibroblasts**

Hoa T. Le, Kalyan Golla, Ryan Karimi, Michael R. Hughes, Flavia Lakschevitz, Douglas B. Cines, M. Anna Kowalska, Mortimer Poncz, Kelly M. McNagny, Lari Häkkinen and Hugh Kim

## **SUPPLEMENTAL FIGURE LEGEND**

**Supplemental Figure. PF4 does not upregulate MMP-2 gene transcription. A-B.** Bar graphs depict MMP-2 gene transcription in cells cultured in the absence (-) or presence (+) of recombinant PF4 at the indicated concentrations for 6 h (**A**) and 24 h (**B**). Gene expression was normalized to the reference gene *GAPDH*. The untreated sample (0) was set at 1. Data are expressed as mean  $\pm$  SD and represent three independent experiments.

# Supplemental Figure

**A**

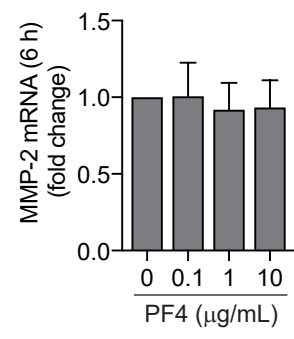

**B**

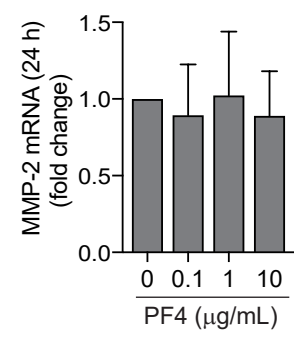

Supplement: 41598_2022_19850_MOESM1_ESM.pdf [file 41598_2022_19850_MOESM1_ESM.pdf]
